# Supplementary material for: Sodium Selenite Alleviates Breast Cancer-Related Lymphedema Independent of Antioxidant Defense System
Source: PubMed Central journal article supplement (PMC6566195; doi:10.3390/nu11051021), 2019-05-07
Supplement: nutrients-11-01021-s001.pdf [file nutrients-11-01021-s001.pdf]

**Table S1.** Description of intervention schedule.

| Session        | Time from first session (days) |                              |                           | <i>p</i> |
|----------------|--------------------------------|------------------------------|---------------------------|----------|
|                | Control<br>( <i>n</i> = 12)    | Selenium<br>( <i>n</i> = 14) | Total<br>( <i>n</i> = 26) |          |
| Second session | 3.3 ± 0.8                      | 3.0 ± 1.1                    | 3.2 ± 1.0                 | 0.560    |
| Third session  | 6.9 ± 1.9                      | 6.4 ± 2.1                    | 6.6 ± 2.0                 | 0.432    |
| Fourth session | 9.8 ± 2.4                      | 9.9 ± 3.7                    | 9.8 ± 3.1                 | 0.667    |
| Fifth session  | 13 ± 2.8                       | 13 ± 5.1                     | 13 ± 4.2                  | 0.940    |

Values are presented as mean ± standard deviation (SD). Significant differences between groups were determined by Mann–Whitney *U* test.

**Table S2.** Proportion of patients by lymphedema stage.

|                       | CTRL<br>( <i>n</i> = 12) |           |           | SE<br>( <i>n</i> = 14) |           |           |
|-----------------------|--------------------------|-----------|-----------|------------------------|-----------|-----------|
|                       | Baseline                 | 2-week    | Follow-up | Baseline               | 2-week    | Follow-up |
| Stage II              | 1 (8.33)                 | 1 (8.33)  | 2 (16.7)  | 2 (14.3)               | 11 (78.6) | 12 (85.7) |
| Stage III             | 11 (91.7)                | 11 (91.7) | 10 (83.3) | 12 (85.7)              | 3 (21.4)  | 2 (14.3)  |
| <i>p</i> <sup>*</sup> | 0.309                    |           |           | 0.001                  |           |           |
| <i>p</i> <sup>†</sup> | 0.002                    |           |           |                        |           |           |

Values are presented as *n* (%). \* *p*-values were determined by generalizing estimating equation using time as a fixed effect. † *p*-values were determined by generalizing estimating equation using time × group as a fixed effect.
